# Supplementary material for: A Machine Learning Approach to Predicting Autism Risk Genes: Validation of Known Genes and Discovery of New Candidates
Source: PubMed Central journal article supplement (PMC7513695; doi:10.3389/fgene.2020.500064), 2020-09-10

bp  
p = 4e-19

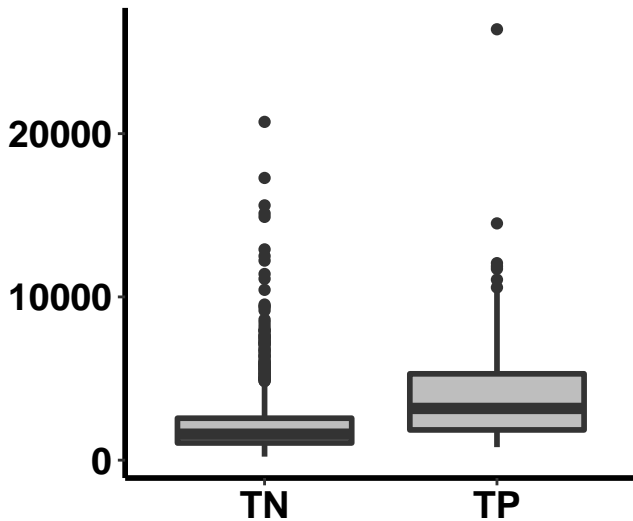

mu\_syn  
p = 1e-16

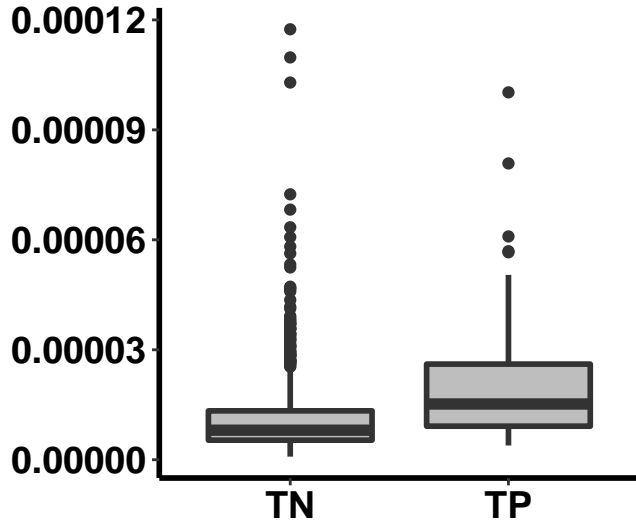

mu\_mis  
p = 2e-18

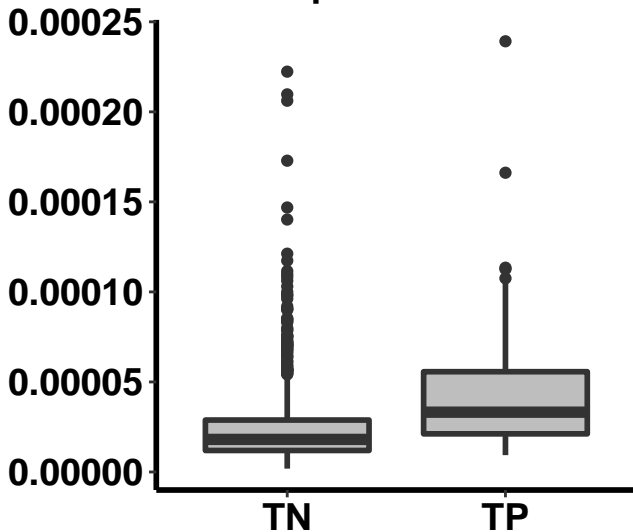

mu\_lof  
p = 4e-19

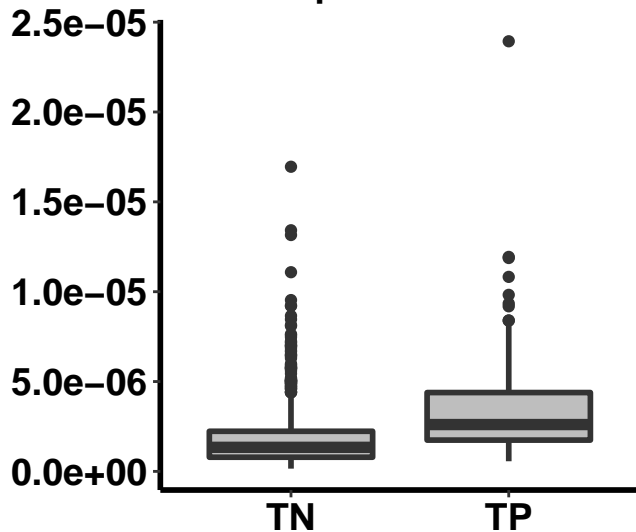

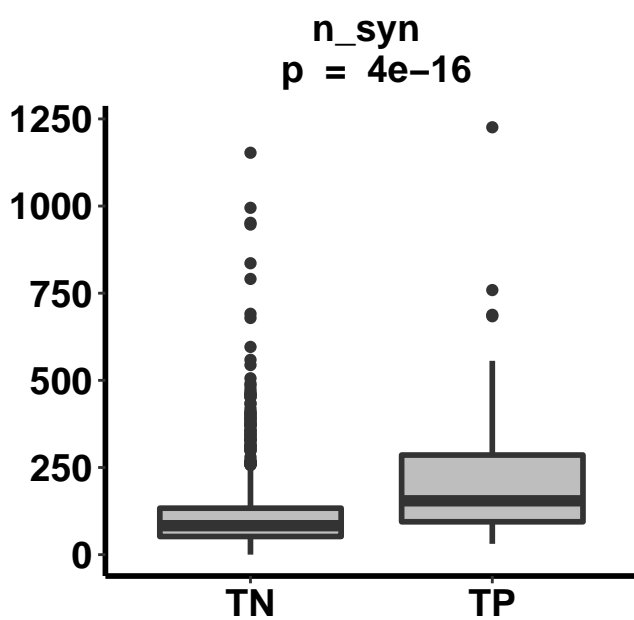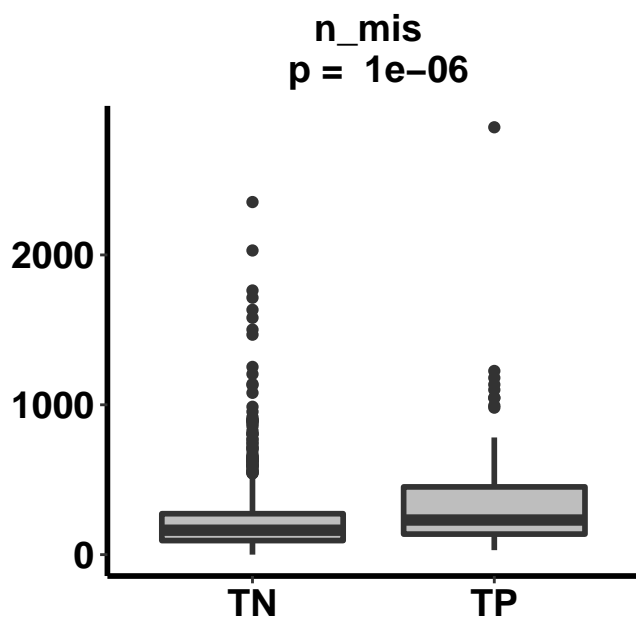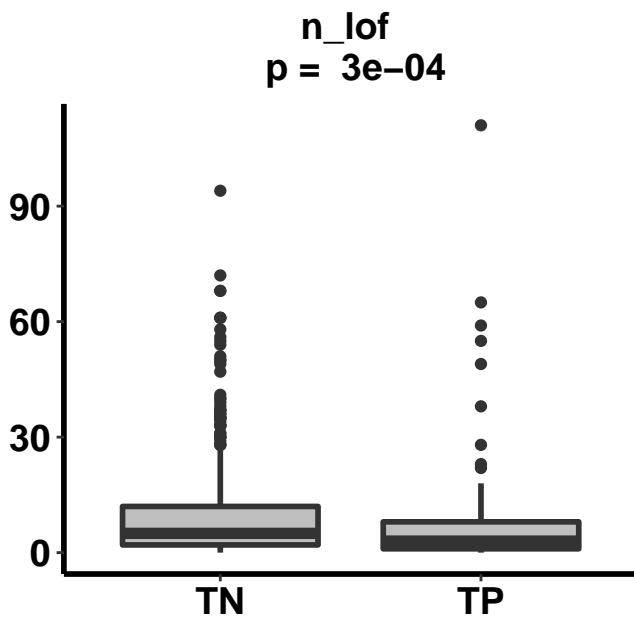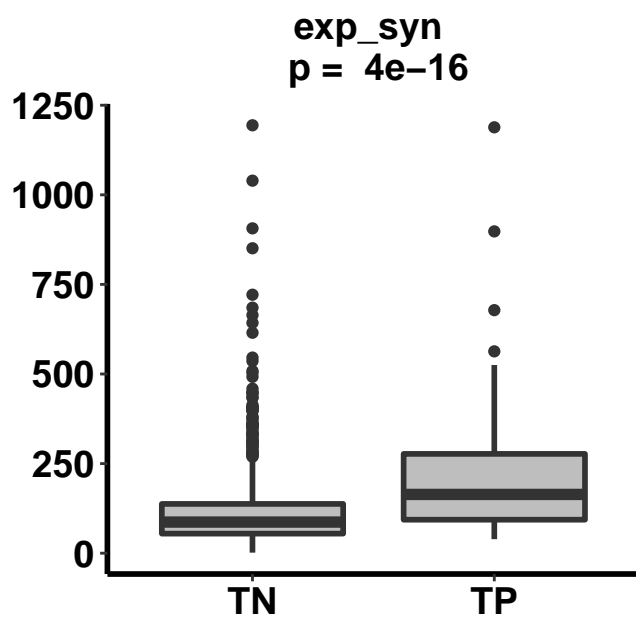

**exp\_mis**  
**p = 2e-17**

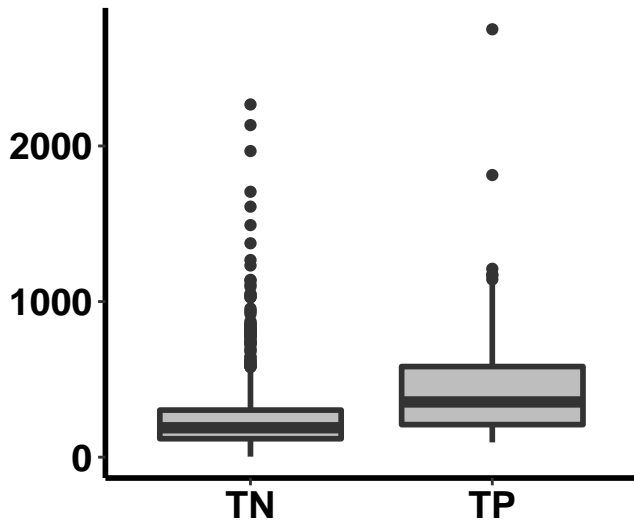

**exp\_lof**  
**p = 6e-17**

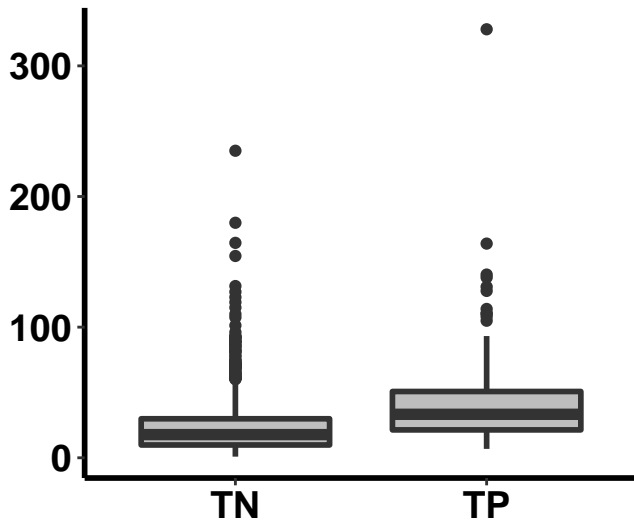

**syn\_z**  
**p = 2e-01**

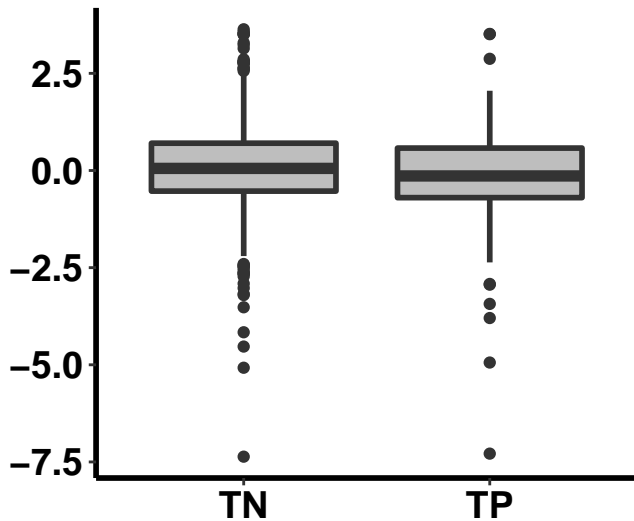

**mis\_z**  
**p = 7e-16**

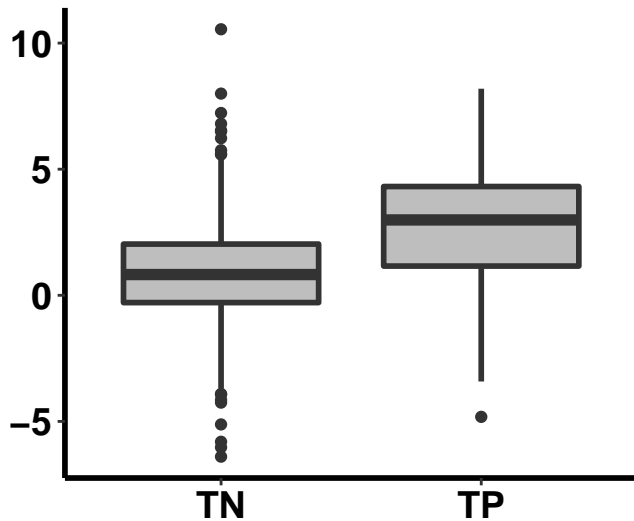

**lof\_z**  
**p = 2e-23**

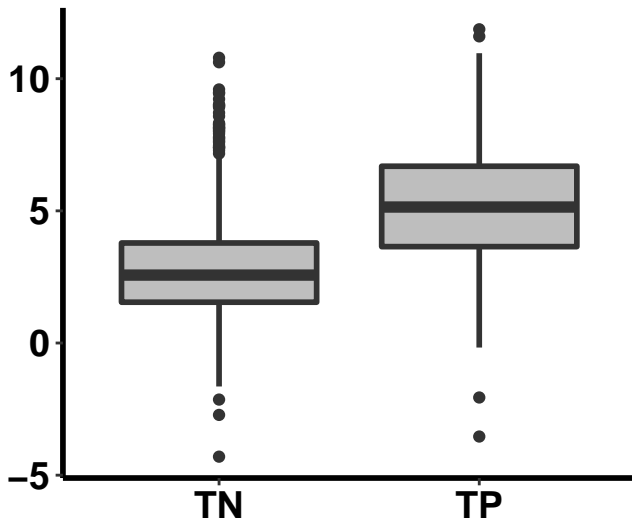

**pLI**  
**p = 2e-20**

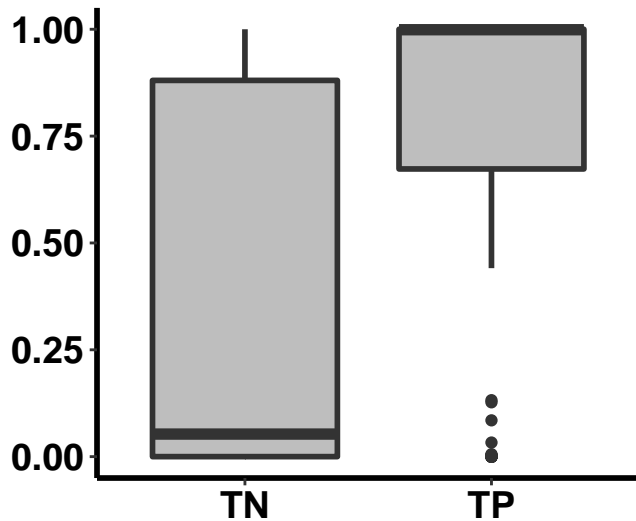

**pRec**  
**p = 5e-21**

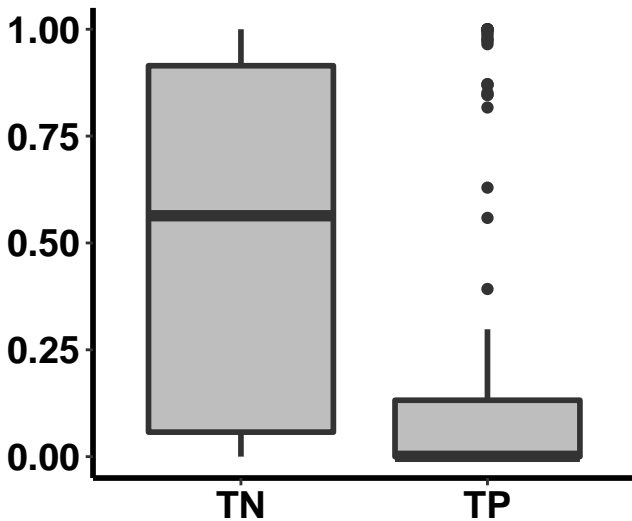

**pNull**  
**p = 3e-24**

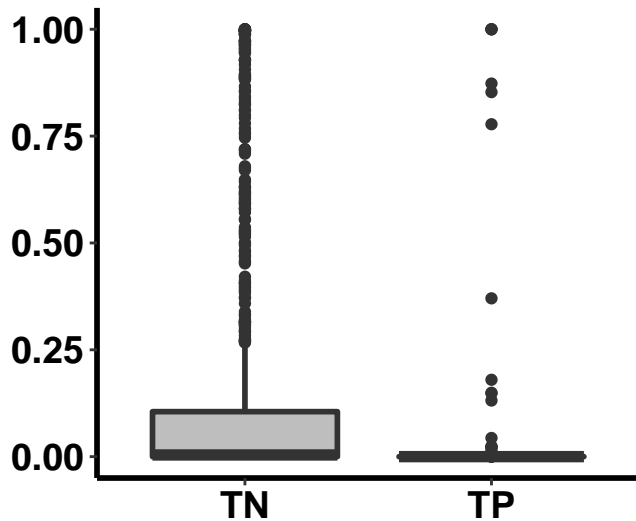

Supplement: Image_3.pdf [file Image_3.pdf]
