# Supplementary material for: A Machine Learning Approach to Predicting Autism Risk Genes: Validation of Known Genes and Discovery of New Candidates
Source: Front Genet. 2020 Sep 10;11:500064. doi: 10.3389/fgene.2020.500064 (PMC7513695; doi:10.3389/fgene.2020.500064)
Supplement: TABLE S1 — Feature sets included in prediction model. [file Table_1.xlsx]

## Sheet: Sheet1
		Table S1. Feature sets included in prediction model
		Feature sets	Source
		Spatiotemporal gene expression features	https://www.brainspan.org/static/download.html
		524 gene-level expression values across 13 developmental stages in 31 brain regions.	source file: "RNA-Seq Gencode v10 summarized to genes"
		Brain network features	Derived from Brainspan expression data and Inweb PPI network
		node degrees
		clones centralities
		betweenness centralities
		Boncich power centralities
		eigenvector centralities
		alpha centralities
		1st principle component
		hub score
		coreness
		PageRank
		Constraint metrics	ftp://ftp.broadinstitute.org/pub/ExAC_release/release0.3.1/functional_gene_constraint
		syn_z (Z scores for synonymous variants)	source file: "fordist_cleaned_exac_r03_march16_z_pli_rec_null_data.txt"
		mis_z ( Z scores for missense variants)
		lof_z (Z scores for LoF variants)
		pLI (probability of being LoF intolerant
		pRec (probability of being intolerant of homozygous but not heterozygous LoF variants)
		pNull (probability of being tolerant of both heterozygous and homozygous LoF variants)
		Other gene features	ftp://ftp.broadinstitute.org/pub/ExAC_release/release0.3.1/functional_gene_constraint
		bp (the number of coding base pairs)	source file: "fordist_cleaned_exac_r03_march16_z_pli_rec_null_data.txt"
		mu_syn (probability of mutations across the transcript for synonymous variants)
		mu_mis (probability of mutations across the transcript for missense variants)
		mu_lof (probability of mutations across the transcript for LoF variants)
		n_syn (number of rare synonymous variants)
		n_mis (number of rare missense variants)
		n_lof (number of rare LoF variants)
		exp_syn (depth adjusted number of expected rare synonymous variants)
		exp_mis (depth adjusted number of expected rare missense variants)
		exp_lof (depth adjusted number of expected rare LoF variants)
